# Citrulline a More Suitable Substrate than Arginine to Restore NO Production and the Microcirculation during Endotoxemia

Karolina A. P. Wijnands<sup>1,2\*</sup>, Hans Vink<sup>3,4</sup>, Jacob J. Briedé<sup>5,6</sup>, Ernst E. van Faassen<sup>7</sup>, Wouter H. Lamers<sup>2,8</sup>, Wim A. Buurman<sup>1,2</sup>, Martijn Poeze<sup>1,2</sup>

**1** Department of Surgery, Maastricht University Medical Center, Maastricht, The Netherlands, **2** NUTRIM School for Nutrition, Toxicology and Metabolism, Maastricht, The Netherlands, **3** Department of Physiology, Maastricht University Medical Center, Maastricht, The Netherlands, **4** CARIM Cardiovascular Research Institute of Maastricht, Maastricht, The Netherlands, **5** Department of Toxicogenomics, Maastricht University Medical Center, Maastricht, The Netherlands, **6** GROW School for Oncology and Developmental Biology, Maastricht, The Netherlands, **7** Department of Nephrology, Leiden University Medical Center, Leiden, The Netherlands, **8** Department of Anatomy and Embryology, Maastricht University Medical Center, Maastricht, The Netherlands

## Abstract

**Background:** Impaired microcirculation during endotoxemia correlates with a disturbed arginine-nitric oxide (NO) metabolism and is associated with deteriorating organ function. Improving the organ perfusion in endotoxemia, as often seen in patients with severe infection or systemic inflammatory response syndrome (SIRS) is, therefore, an important therapeutic target. We hypothesized that supplementation of the arginine precursor citrulline rather than arginine would specifically increase eNOS-induced intracellular NO production and thereby improve the microcirculation during endotoxemia.

**Methodology/Principal Findings:** To study the effects of L-Citrulline and L-Arginine supplementation on jejunal microcirculation, intracellular arginine availability and NO production in a non-lethal prolonged endotoxemia model in mice. C57/Bl6 mice received an 18 hrs intravenous infusion of endotoxin (LPS, 0.4  $\mu\text{g}\cdot\text{g bodyweight}^{-1}\cdot\text{h}^{-1}$ ), combined with either L-Citrulline (6.25  $\text{mg}\cdot\text{h}^{-1}$ ), L-Arginine (6.25  $\text{mg}\cdot\text{h}^{-1}$ ), or L-Alanine (isonitrogenous control; 12.5  $\text{mg}\cdot\text{h}^{-1}$ ) during the last 6 hrs. The control group received an 18 hrs sterile saline infusion combined with L-Alanine or L-Citrulline during the last 6 hrs. The microcirculation was evaluated at the end of the infusion period using sidestream dark-field imaging of jejunal villi. Plasma and jejunal tissue amino-acid concentrations were measured by HPLC, NO tissue concentrations by electron-spin resonance spectroscopy and NOS protein concentrations using Western blot.

**Conclusion/Significance:** L-Citrulline supplementation during endotoxemia positively influenced the intestinal microvascular perfusion compared to L-Arginine-supplemented and control endotoxemic mice. L-Citrulline supplementation increased plasma and tissue concentrations of arginine and citrulline, and restored intracellular NO production in the intestine. L-Arginine supplementation did not increase the intracellular arginine availability. Jejunal tissues in the L-Citrulline-supplemented group showed, compared to the endotoxemic and L-Arginine-supplemented endotoxemic group, an increase in degree of phosphorylation of eNOS (Ser 1177) and a decrease in iNOS protein level. In conclusion, L-Citrulline supplementation during endotoxemia and not L-Arginine reduced intestinal microcirculatory dysfunction and increased intracellular NO production, likely via increased intracellular citrulline and arginine availability.

**Citation:** Wijnands KAP, Vink H, Briedé JJ, van Faassen EE, Lamers WH, et al. (2012) Citrulline a More Suitable Substrate than Arginine to Restore NO Production and the Microcirculation during Endotoxemia. PLoS ONE 7(5): e37439. doi:10.1371/journal.pone.0037439

**Editor:** François Blachier, National Institute of Agronomic Research, France

**Received:** February 9, 2012; **Accepted:** April 23, 2012; **Published:** May 29, 2012

**Copyright:** © 2012 Wijnands et al. This is an open-access article distributed under the terms of the Creative Commons Attribution License, which permits unrestricted use, distribution, and reproduction in any medium, provided the original author and source are credited.

**Funding:** This study was supported by grants from ZonMw Innovational Research Incentives (VENI 916.76.191) and the European Society of Intensive Care Medicine: Eli Lilly Sepsis Elite Award 2008. The funders had no role in study design, data collection and analysis, decision to publish, or preparation of the manuscript.

**Competing Interests:** The authors received a grant from ESICM, the European society of Intensive Care medicine for our peer reviewed research proposal. Eli Lilly provided the price money to ESICM for this Sepsis Elite award in 2008 without any further conditions. This does not alter the authors' adherence to all the PLoS ONE policies on sharing data and materials.

\* E-mail: n.wijnands@maastrichtuniversity.nl

## Introduction

XEndotoxemia and inflammatory conditions, such as sepsis are associated with multiple-organ failure. This organ failure is caused by a dysfunctional organ perfusion at the microcirculatory level [1–3], which makes organ perfusion an important therapeutic target [4,5]. Endotoxemia and inflammation-induced perturba-

tions in organ perfusion are characterized by redistribution of blood flow between and within organs at the microcirculatory level and lead to ischemia in critical tissues such as lung, liver and gut [6–8]. Especially the villi of the small intestine are sensitive to a decreased blood flow and suffer from microcirculatory disturbances during endotoxemic conditions such as severe inflammation and sepsis [9–11]. Previous experimental and clinical studies

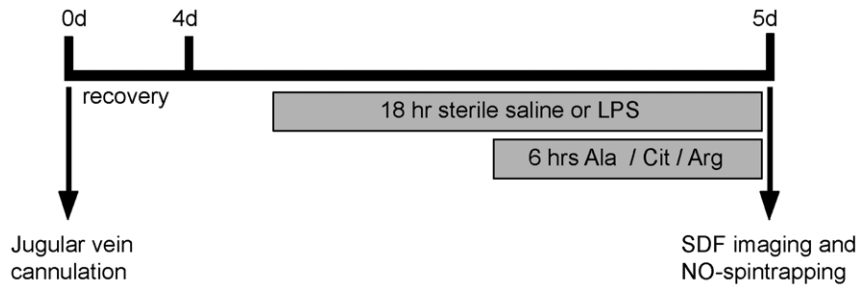

**Figure 1. Experimental set up of the prolonged endotoxemia model.** Mice were fitted with a jugular vein cannula at  $t=0$  d. After 4 days ( $t=4$  d) an 18 hours continuous infusion with lipopolysaccharides (LPS) was started, which was combined during the last 6 hours with an infusion of Citrulline (Cit), Arginine (Arg) or an isonitrogenous quantity of the placebo Alanine (Ala). After completing the treatment, sidestream dark-field (SDF) imaging was used to quantify the microcirculation in the jejunal villi or Nitric Oxide (NO) spin trapping with iron-diethyldithiocarbamate (DETC) complexes to measure NO production *in vivo*. doi:10.1371/journal.pone.0037439.g001

demonstrated that hepatosplanchnic hypoperfusion is related to intestinal mucosal damage, impaired tissue oxygenation and an increase in inflammatory mediators [6,12–14].

An imbalance in Nitric Oxide (NO) metabolism at the cellular level, especially the endothelium, is thought to play a crucial role in the development of endotoxemic-related microcirculatory disturbances, such as in sepsis [15–18]. NO is produced by the conversion of arginine into citrulline by one of the three isoforms of nitric-oxide synthase (NOS) and is thought to depend largely on extracellular arginine availability, which is decreased during endotoxemia and sepsis [15,17,19]. Several mechanisms were proposed to explain arginine deficiency in diseases with an increased arginine catabolism such as endotoxemia and sepsis. Especially, enhanced activity of Arginase-1 [20,21] and iNOS (NOS2), but also diminished *de novo* arginine synthesis from citrulline and a diminished *de novo* citrulline synthesis are relevant mechanism which contribute to arginine deficiency [17,19,22]. iNOS can produce excessive amounts of NO during endotoxemia, which contributes to the decreased arterial pressure and abnormal distribution of the blood flow in the microcirculation [18,23,24]. The resulting low plasma arginine levels may lead to decreased intracellular substrate availability in the microvasculature for eNOS (NOS3) [17]. This decreased substrate availability in combination with endotoxemia-induced eNOS downregulation results in decreased eNOS-mediated NO production, which is considered to result in the microcirculatory disturbances in sepsis [25]. Interestingly, L-Arginine supplementation in prolonged endotoxemia and sepsis failed to increase the intracellular NO production despite increased arginine plasma availability [26–30], hypothetically because the intracellular arginine does not increase during L-Arginine supplementation [15,22].

The co-localization of eNOS and ASS in the caveola of the endothelial cells indicates a tight intracellular coupling between citrulline, arginine and the NO metabolism [27]. The presence of ASS in endothelial cells offers the opportunity to use L-Citrulline supplementation to increase intracellular endothelial arginine availability for NO production [16,22,27] and, thereby, to ameliorate microcirculatory dysfunction. We therefore hypothesize that L-Citrulline supplementation could improve splanchnic microcirculation by increasing the intracellular citrulline, arginine and NO availability. Therefore, we investigated the effects of L-Citrulline and L-Arginine supplementation on the microcirculation, the intracellular arginine availability and NO production in a murine prolonged endotoxemia model.

## Materials and Methods

Additional details about animals and procedures are provided in the **Methods S1**.

### Animals

Sixty-five male C57/Bl6 mice with a mean weight of 27 g (range 26–28.5) were obtained from the Central Animal Facilities of the Maastricht University Medical Center. The protocol was approved by the Committee on the Ethics of Animal Experiments of the Maastricht University Medical Center (Permit Number: 2008-042 and 2010-172). (**additional details in the online Methods S1**).

### Experimental Protocol

Four days prior to the experimental period, mice received a jugular vein catheter (Silclear tubing, MEDNET, Münster, Germany) which was fixed to the head with glass ionomer cement (FujiCEM Automix, Instech Solomon, Plymouth Meeting, PA). Mice ( $n=65$ ) were randomly allocated to an 18 hour infusion with either sterile 0.9% saline ( $n=26$ ) or lipopolysaccharide (LPS; *E. Coli* O55:B5, Sigma Aldrich, St. Louis, MO) ( $n=39$ ) (**Figure 1**). LPS ( $0.4 \mu\text{g/g bodyweight}^{-1}\cdot\text{h}^{-1}$ ) was administered with a continuous flow rate of  $83 \mu\text{L/h}$ . In the final 6 hours of the LPS infusion, L-Citrulline ( $1.25 \text{ g/kg total}$ ;  $n=13$ ; “LPS-Cit” group), L-Arginine ( $1.25 \text{ g/kg total}$ ;  $n=13$ ; “LPS-Arg” group) or an isonitrogenous dosage of the placebo amino acid L-Alanine ( $2.5 \text{ g/kg total}$ ;  $n=13$ ; “LPS-Ala” group) was added to the LPS infusate. All mice survived the experiments. To determine the clinical manifestations of endotoxemia a semi-quantitative evaluation score was developed. Contents of the score were based on the specific endpoints used in previous endotoxemia models in small laboratory animals of our group [31,32] and from the human endpoints for infectious animal models [33]. These characteristic clinical manifestations of endotoxemia (piloerection/erection of the fur, exudates around the eyes and nostrils, lethargy, hypothermia, diarrhea and diminished locomotor activity) were scored by the animal care taker, blinded for treatment. A 2-points (absent/present) score was used for lethargy, hypothermia and diarrhea, and a 3-points score (absent/moderate/severe) for the evaluation of piloerection/erection of the fur, exudates around the eyes/nostrils and diminished locomotor activity.

The L-Citrulline and L-Arginine dosages were extrapolated from the arginine dosages used in both porcine endotoxemia [34] and a human arginine supplementation study (Luiking, Poeze, Deutz, unpublished data), taking in consideration that the nitrogen

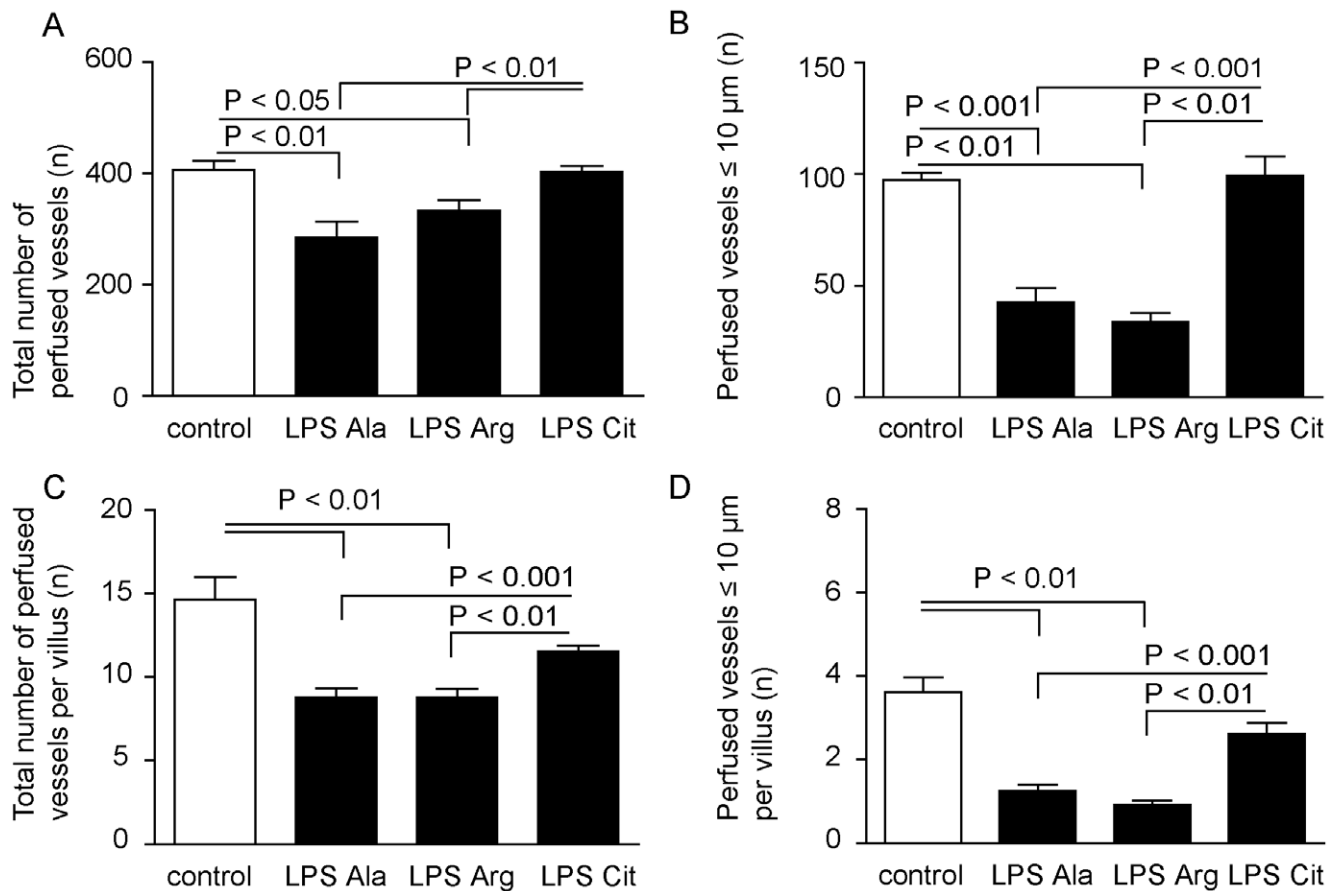

**Figure 2. Circulation measurements with SDF imaging in the control, LPS-Ala, LPS-Arg and LPS-Cit groups.** (A) L-Citrulline supplementation improved the number (mean $\pm$ SEM) of measurable perfused vessels in the jejunal microcirculation during endotoxemia, (B) in particular of vessels with a diameter  $\leq 10 \mu\text{m}$  ( $P < 0.01$ ), compared to LPS-Ala and LPS-Arg supplemented animals. (C) The total number of perfused vessels per villus and (D) microcirculatory vessels with a diameter  $\leq 10 \mu\text{m}$  per villus were also significantly lower in the LPS-Ala and LPS-Arg supplemented animals compared to the control and LPS-Cit group. doi:10.1371/journal.pone.0037439.g002

requirements in rodents are ten times higher than in humans [35,36].

The control group was treated with 0.9% saline and L-Alanine ( $n = 13$ ; “control” group). To investigate the role of L-Citrulline supplementation during physiological conditions mice were treated with 0.9% saline and L-Citrulline ( $n = 13$ , “NaCl-Cit”-group, data displayed in the online supplemental material). In total, mice received 1.5 mL fluid intravenously during the experimental period. Throughout final experiments (microcirculation, NO measurements, blood/tissue sampling), body temperature was maintained at  $37^\circ\text{C}$  using a heating pad and an infrared heating lamp with temperature controller connected to a rectal probe (Technical Service, Maastricht University). The mean arterial pressure (MAP) was measured during the microcirculatory measurements. In brief, a polyethylene tubing was inserted in the right carotid artery and connected to a low-volume pressure transducer to register the MAP (**additional details in the online Methods S1**).

### Microcirculation Measurements

After the 18 hours infusion, mice ( $n = 40$ ) were anaesthetized and a small segment of the jejunum was exteriorized after a midline incision in the abdomen. A longitudinal incision in the jejunal segment was made to microscopically visualize the

microcirculation in the mucosa with a sidestream dark-field (SDF) imager [37,38]. The surgical procedure is based on the technique used by Massberg et al. [39] who used intravital fluorescence microscopy to evaluate the mucosal jejunal microcirculation. A specially designed stand was used to stabilize the SDF imager and to prevent pressure on the tissue or camera movement during the measurements. In addition, the microcirculation, defined as number of perfused microcirculatory vessels (diameter  $\leq 10 \mu\text{m}$ ) and the total number of perfused vessels ( $1 \mu\text{m} \leq \text{diameter} \leq 50 \mu\text{m}$ ) were measured and analyzed with Image J and Matlab. Furthermore, the characteristics of the microcirculation according to de Backer et al [2,40,41] were analyzed using the Automated Vascular Analysis software 3.0 (Microscan, Amsterdam, The Netherlands). Since Ava 3.0 was developed to analyze the sublingual microcirculation, adjustments as suggested by de Backer et al were made to analyze the jejunal microcirculation [40]. In brief, the average microvascular flow index (MFI), the determination of the predominant type of flow in the four quadrants of the image was determined (described as 0 = absent, 1 = intermittent, with at least 50% of the time no flow, 2 = sludging, 3 = normal or 4 = hyperdynamic flow) [2]. The percentage of perfused villi (%) was calculated based on the number of perfused villi per field divided by the total number of villi per field. The total vessel density (TVD;  $\text{mm}/\text{mm}^2$ ) was

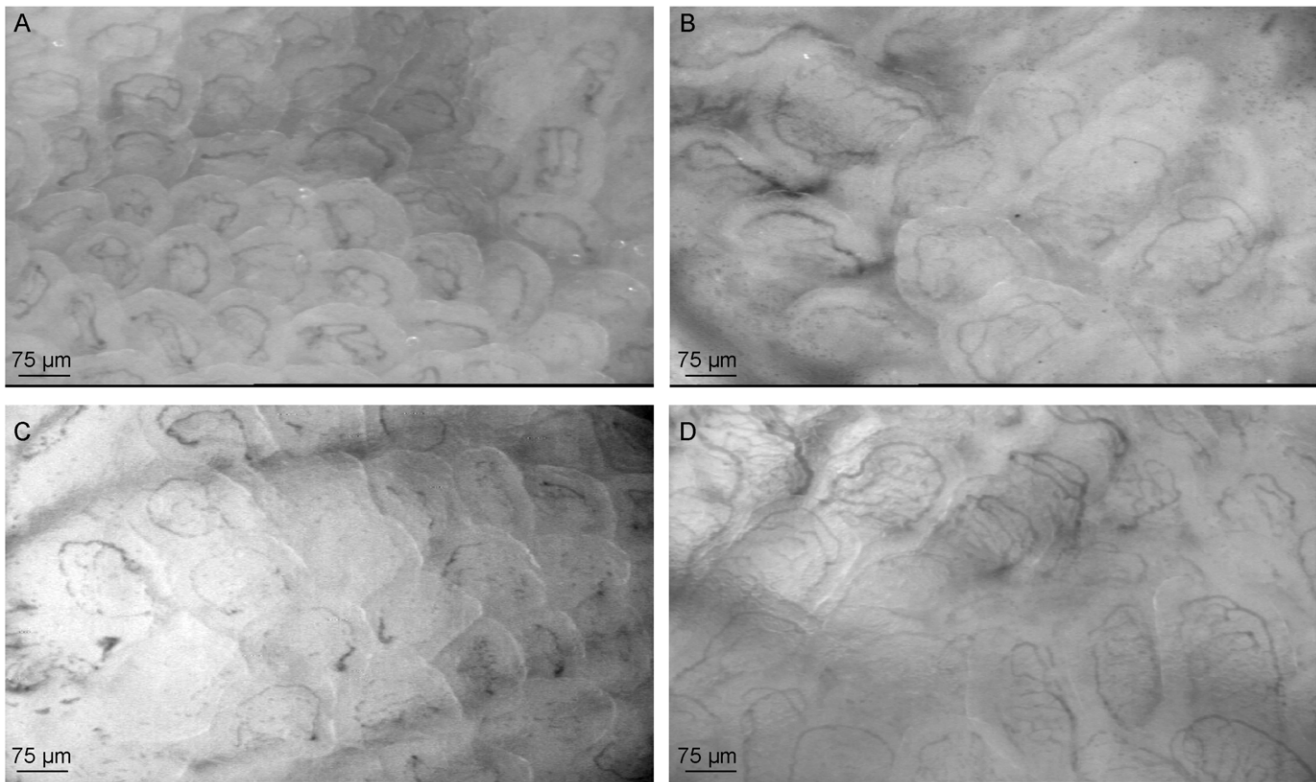

**Figure 3. Representative live images of the microcirculatory measurements in jejunal villi with SDF imaging.** (A) Representative live image of the jejunal microcirculation in a control mouse. (B) Representative live image of the jejunal microcirculation in a LPS-Ala treated mouse which shows only perfusion of the larger vessels. (C) Representative live image of a LPS-Arg treated mouse which shows a comparable perfusion pattern as the LPS-Ala treated mouse. (D) Representative live image of a LPS-Cit treated mouse, which's shows more small perfused vessels per villus. doi:10.1371/journal.pone.0037439.g003

calculated as the number of vessels crossing the arbitrary lines in Ava 3.0 divided by the total length of the lines. The perfused vessel density (PVD; mm/mm<sup>2</sup>) and proportion of perfused vessels (PPV; %) were calculated based on the TVD and perfusion of these vessels [40,41] (**additional details in the online Methods S1**).

#### Blood Sampling, Sample Processing and Measurements of Amino Acids

After the microcirculatory measurements, mice were sacrificed through a cardiac puncture to collect 600–800 µL arterial blood for amino acid determination. After sampling, blood was collected in pre-chilled, heparinized microvettes® (Sarstedt, Numbrecht, Germany) on ice and centrifuged immediately (4°C for 15 minutes at 8,500 g) to obtain plasma. For determination of plasma amino-acid concentrations, 100 µL plasma was added to 200 µL acetonitrile, for deproteinization, vortexed and stored at -80°C until further analysis. To determine tissue amino-acid concentrations, frozen homogenized tissue samples were added to 250 µL of 5% sulfosalicylic acid and 0.1 g glass beads (1.0 mm diameter) for deproteinization, beaten for 30 seconds at maximum speed with the mini-beadbeater (Biospec products) and stored at -80°C until further analysis. Plasma and tissue arginine, citrulline and ornithine concentrations were measured with a high-performance liquid chromatography (HPLC) after automated pre-column derivatization with o-phthalaldehyde as previously described [42].

#### In vivo Tissue NO Measurements

In brief, the *in vivo* NO levels in jejunal tissues (n = 30) were quantified by NO-trapping with Fe<sup>2+</sup>-dithiocarbamate complexes as mono-nitrosyl iron complexes (MNIC) [43]. NO concentrations were calculated from the height of the three-line NO amplitude with Bruker WINEPR software as described [43] (**additional details in the online Methods S1**).

#### Protein Isolation and Western Blot Analysis

Protein in the tissue samples was isolated with the AllPrep DNA/RNA/Protein kit (Qiagen, Hilden, Germany) according to the manufacturer's protocol. Western blot membranes were incubated overnight with rabbit polyclonal anti-mouse iNOS (Abcam, Cambridge, MA) or rabbit polyclonal anti-mouse phosphorylated eNOS (Ser1177) (Cell signaling technology, Danvers, MA) at 4°C and incubated with the proper secondary antibody at room temperature for 1 hour, before capturing the signals on X-ray film using a chemiluminescent reaction (**additional details in the online Methods S1**).

#### Statistical Analysis

Statistical analysis of the data was performed using SPSS 15.0 (SPSS, Chicago, IL). In case of Gaussian distribution one-way ANOVA with post-hoc Bonferroni correction between groups was conducted. A non-parametric Kruskal-Wallis test was performed to determine significance in case of a non-Gaussian distribution. A two-sided P-value < 0.05 was considered as statistical significant. Data are represented as mean and standard error of the mean (SEM).

## Results

### Model Characteristics

The characteristic clinical manifestations of endotoxemia (piloerection/erection of the fur, exudates around the eyes and nostrils, hypothermia, lethargy, diarrhea and diminished locomotor activity) were present in all three LPS-treated groups. However, these signs were more pronounced in the LPS-Ala and LPS Arg group than the LPS-Cit group (See **Figure S1**). The average core temperature of the mice prior to the start of the microcirculatory measurements was significantly lower in the LPS-Ala ( $33.8 \pm 1.7^\circ\text{C}$ ) and the LPS-Arg groups ( $33.8 \pm 1.0^\circ\text{C}$ ) than in the control group ( $35.8 \pm 0.7^\circ\text{C}$ ; both  $P < 0.05$ ) and the LPS-Cit group ( $35.9 \pm 1.0^\circ\text{C}$ ; both  $P < 0.05$ ). Prior to the microcirculatory measurements an infrared heating lamp with temperature controller was used to increase the core temperature of the mice, which resulted in stabilization of the core temperature during the microcirculatory measurements. The average core temperature of the mice during the microcirculation measurements did not differ between groups ( $36.9 \pm 0.1^\circ\text{C}$  in the control,  $35.0 \pm 2.1^\circ\text{C}$  in the LPS-Ala group,  $35.7 \pm 0.5^\circ\text{C}$  in the LPS-Arg and  $36.2 \pm 0.9^\circ\text{C}$  in the LPS-Cit group).

The mean arterial blood pressure (MAP) during these microcirculatory measurements was significantly higher in the control group versus the LPS-Ala group (control versus LPS-Ala,  $70.1 \pm 1.8$  versus  $55.0 \pm 1.5$  mmHg;  $P < 0.01$ ). In the L-Citrulline and L-Arginine supplemented groups the MAP was also significantly higher compared to the LPS-Ala group (LPS-Cit versus LPS-Ala,  $64.7 \pm 1.5$  versus  $55.0 \pm 1.5$  mmHg;  $P = 0.01$  and LPS-Arg versus LPS-Ala,  $65.0 \pm 2.8$  versus  $55.0 \pm 1.5$  mmHg;  $P < 0.05$ ). The MAP was comparable between the LPS-Cit group and the LPS-Arg group (LPS-Cit versus LPS-Arg;  $P = 0.9$ ). MAP did not differ significantly between the control group ( $70.1 \pm 1.8$  mmHg) and the LPS-Cit or LPS-Arg group ( $P = 0.08$  and  $P = 0.2$ , respectively).

### Citrulline Supplementation Improved the Microcirculation in the Gut During Endotoxemia

Endotoxemia resulted in a significantly decreased total number of perfused vessels ( $1 \mu\text{m} \leq \text{diameter} \leq 50 \mu\text{m}$ ) in the LPS-Ala group compared to control ( $n = 8$ ;  $P < 0.01$ ; **Figure 2A**). L-Arginine administration during endotoxemia did not result in a restoration of the number of perfused vessels ( $n = 8$ ;  $P < 0.05$ ). In contrast, L-Citrulline supplementation during endotoxemia restored the total number of perfused vessels to nearly the number of vessels seen in the control group ( $n = 8$ ;  $P = 1.0$ ). The observed difference in the total number of perfused vessels is caused by the decreased circulation in the smallest ( $\leq 10 \mu\text{m}$ ) vessels in the LPS-Ala and LPS-Arg groups ( $42.5 \pm 6.5$  and  $33.7 \pm 4.1$ , respectively; **Figure 2B**). The number of perfused microcirculatory vessels in the LPS-Cit group was comparable to that in control mice (**Figure 2B**). Furthermore, also the total number as well as the number of small ( $\leq 10 \mu\text{m}$ ) vessels perfused per villus were significantly decreased in the LPS-Ala and LPS-Arg group compared to the control and LPS-Cit treated group (**Figure 2C and 2D**). See **Figure 3A, 3B, 3C, 3D** and the **Videos S1, S2, S3, S4, S5** for representative live images and videos of the microcirculation in the respective groups. The characteristics of the microcirculation according to de Backer et al are displayed in the **Supporting Information Table S1**. Beneficial effects of L-Citrulline supplementation for these characteristics were found compared to the LPS-Ala and LPS-Arg group. L-Citrulline supplementation during physiological conditions did not influence the microcirculation (see **Supporting Information Table S1** and **Figure S2**).

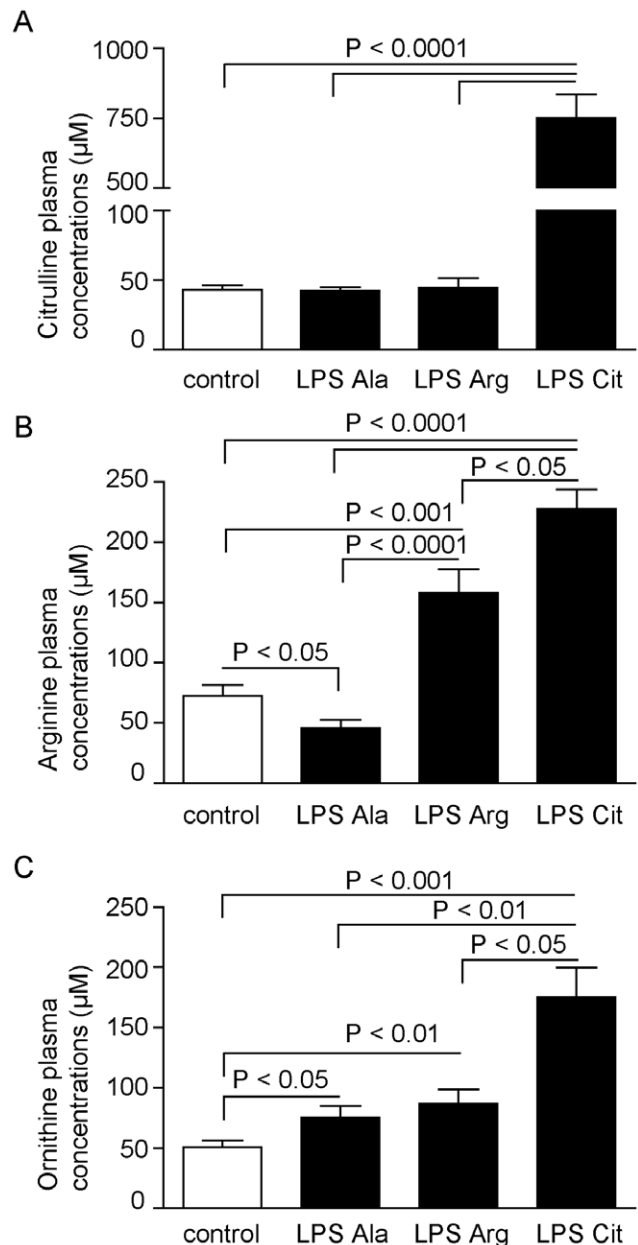

**Figure 4. Amino-acid concentrations in plasma.** (A) Citrulline plasma concentrations increased after L-Citrulline supplementation (LPS-Cit) compared to all other groups ( $P < 0.0001$ ). (B) Plasma arginine concentrations were significantly reduced in the LPS-Ala group compared to the control group ( $P < 0.05$ ), whereas this concentration was significantly increased by L-Arginine or L-Citrulline supplementation (LPS-Arg and LPS-Cit group) compared to both other groups ( $P < 0.0001$ ). (C) Plasma ornithine levels increased in the LPS-Ala treated group compared to the control group ( $P < 0.05$ ) and increased further upon L-Arginine or L-Citrulline supplementation. doi:10.1371/journal.pone.0037439.g004

### Citrulline Enhances Citrulline and Arginine Availability During Endotoxemia and Resulted in Increased Tissue NO Concentration

**Plasma amino acids.** As expected L-Citrulline supplementation increased plasma citrulline concentration  $\sim 20$ -fold ( $P < 0.0001$ ) compared to the control, the LPS-Ala and the LPS-Arg group (**Figure 4A**). L-Citrulline supplementation during

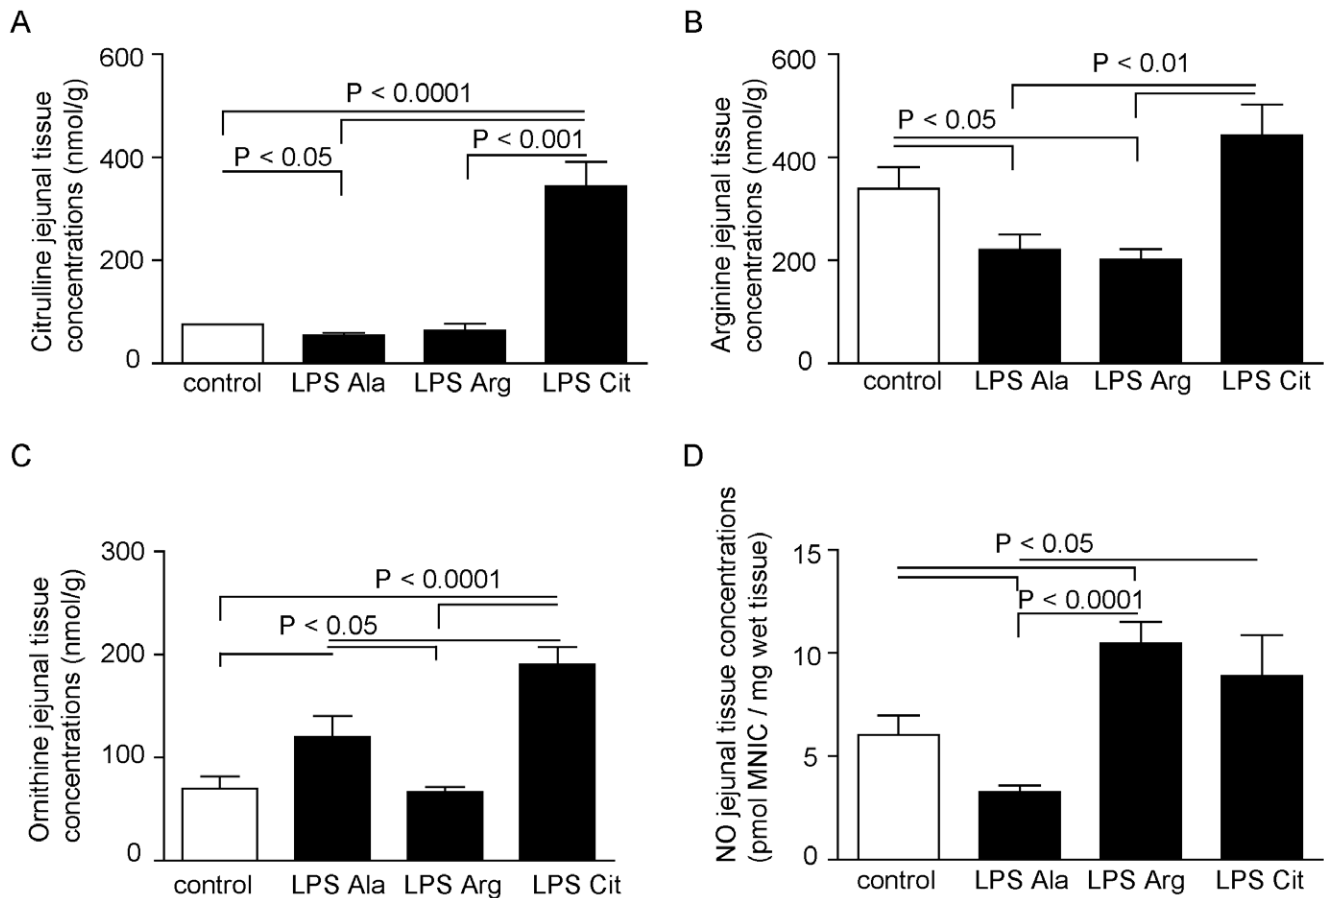

**Figure 5. Amino-acid concentrations and NO production in murine jejunal tissue.** (A) L-Citrulline supplementation (LPS-Cit) increased tissue citrulline concentration compared to the LPS-Ala, LPS-Arg and control groups ( $P < 0.0001$ ) (B) Arginine concentrations were significantly reduced in the LPS-Ala group compared to the control group ( $P < 0.05$ ). Interestingly, this concentration was not increased by L-Arginine supplementation (LPS-Arg), whereas this concentration was significantly increased by L-Citrulline supplementation (LPS-Cit group;  $P < 0.01$ ). (C) Ornithine levels increased in the LPS-Ala treated group compared to the control group ( $P < 0.05$ ) and increased further upon L-Citrulline supplementation ( $P < 0.0001$  relative to the control group and  $P < 0.05$  relative to the LPS group). (D) In the jejunum, prolonged endotoxemia resulted in a significant decrease in NO production (measured as pmol mono-nitrosyl-iron complexes (MNIC)/mg wet tissue) compared to control ( $P < 0.05$ ). NO production was significantly improved in the LPS-Arg and LPS-Cit group compared to the LPS group ( $P < 0.0001$  and  $P < 0.05$  respectively). doi:10.1371/journal.pone.0037439.g005

physiological conditions (NaCl-Cit group) did also result in enhanced plasma citrulline and arginine concentrations versus control (see **Figure S3**). Endotoxemia resulted in a significantly decreased arginine plasma concentration in the LPS-Ala group compared to control ( $n = 13$ ;  $P < 0.05$ ), comparable to the metabolic disturbances in man. For a complete description of the L-arginine concentration during prolonged endotoxemia infusion see also **Figure S4**. In the LPS-Cit group the plasma arginine concentration was significantly increased versus control mice ( $n = 13$ ;  $P < 0.0001$ ) and the LPS-Ala group ( $n = 13$ ;  $P < 0.0001$ ). Although, L-Arginine supplementation enhanced the arginine plasma concentrations in the LPS-Arg group compared to the concentrations in control mice ( $n = 13$ ;  $P < 0.001$ ; **Figure 4B**) and compared to LPS-Ala treated mice ( $n = 13$ ;  $P < 0.0001$ ), these enhanced arginine levels were significantly lower than those in the L-Citrulline supplemented group ( $n = 13$ ;  $P < 0.05$ ). The plasma ornithine concentration was higher in all LPS-treated groups than in the control group (**Figure 4C**).

**Tissue amino-acid concentrations.** The tissue amino-acid concentrations in all groups exhibited results that were largely similar to the changes in plasma concentrations. Endotoxemia resulted in a decreased jejunal tissue arginine concentration in the

LPS-Ala group versus control ( $n = 13$ ;  $P < 0.05$ ), which was accompanied by a significantly decreased tissue citrulline concentration ( $n = 13$ ;  $P < 0.05$ , **Figure 5A and 5B**). Interestingly, the beneficial effects of L-Arginine supplementation in the LPS-Arg group on the plasma concentrations was not observed in the jejunal tissue as the tissue arginine concentration was significantly decreased compared to control ( $n = 13$ ;  $P < 0.05$ , **Figure 5A**). However, L-Citrulline supplementation during endotoxemia also enhanced the tissue arginine concentration compared to LPS-Ala and LPS-Arg treated mice ( $n = 13$ ; both  $P < 0.01$ ). L-Citrulline supplementation under basal conditions also enhanced the tissue arginine concentrations (see **Figure S3**). During endotoxemia ornithine tissue concentrations increased in the LPS-Ala and LPS-Cit treated groups compared to the control group, which was in line with the increase in the plasma concentrations (**Figure 5C**). In the LPS-Arg group ornithine tissue concentrations were lower than in the LPS-Ala group.

**Tissue NO production.** The jejunal NO production, detected as MNIC per mg jejunal tissue, decreased in the LPS-Ala group compared to the control group ( $n = 13$ ,  $P < 0.05$ ). L-Arginine supplementation during endotoxemia enhanced the NO production compared to control and LPS-Ala treated animals

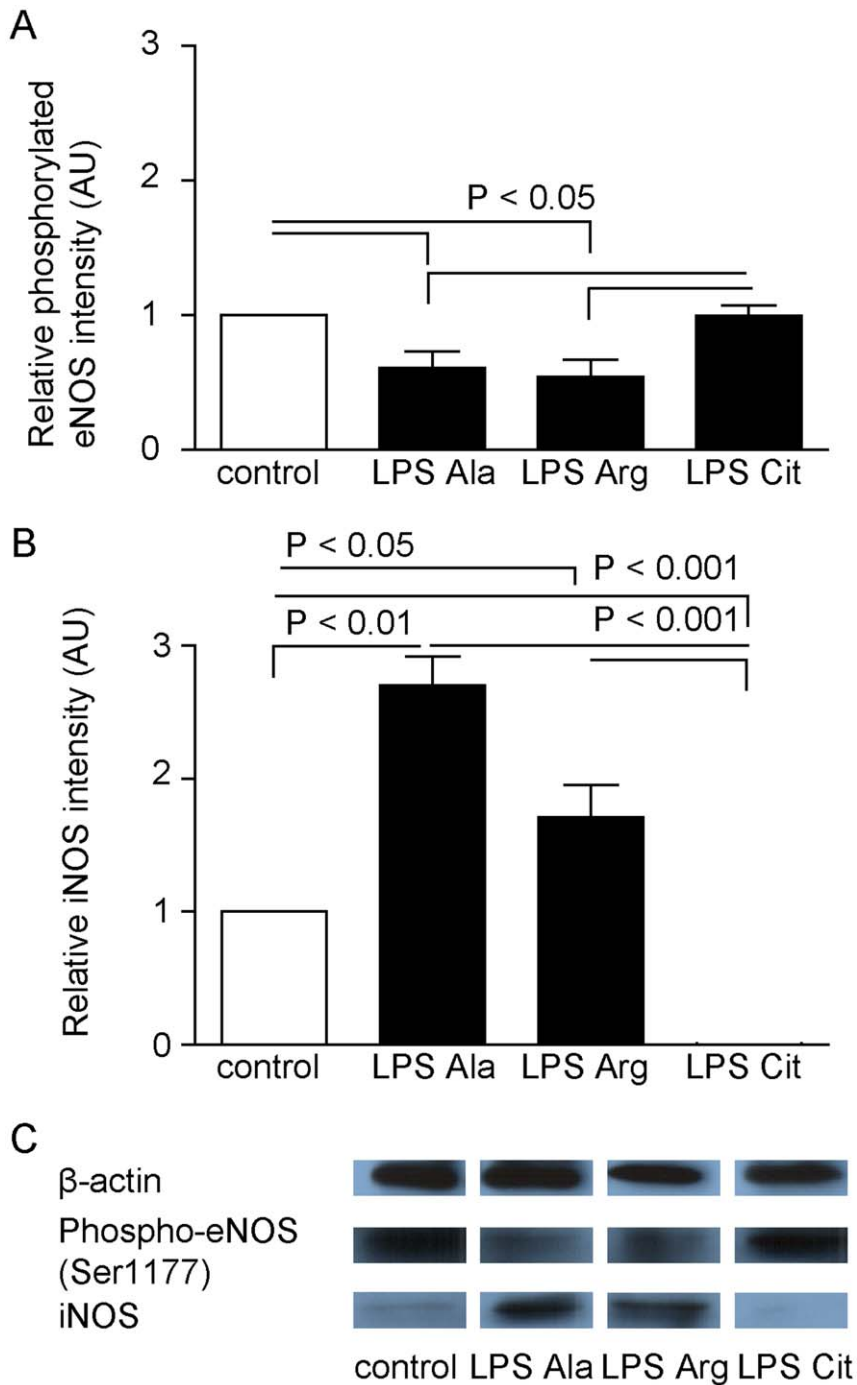

**Figure 6. Phosphorylated eNOS and iNOS protein levels in murine jejunal tissue.** (A) The degree of phosphorylation of eNOS protein (expressed in arbitrary units, AU) was higher in the LPS-Cit group than in the LPS-Ala and LPS-Arg group ( $P < 0.05$ ). (B) The iNOS protein concentration changed in an opposite detection, with significantly lower levels in the control ( $P < 0.05$ ) and LPS-Cit group ( $P < 0.01$ ) than in the LPS-Ala and LPS-Arg group. (C) Representative examples of expression of phosphorylated eNOS (Ser 1177), iNOS and beta-actin by Western blot analysis. doi:10.1371/journal.pone.0037439.g006

(LPS-Arg versus control and versus LPS-Ala,  $n = 13$ ;  $P < 0.0001$  and  $P < 0.05$ , respectively; **Figure 5D**). Also L-Citrulline supplementation resulted in an increased NO production in the jejunum during basal and endotoxemic conditions compared to the LPS-Ala treated mice ( $n = 13$ ;  $P < 0.05$ ; **Figure 5D**; basal data of the NaCl-Cit group see **Figure S5**).

#### Citrulline Supplementation Affects the Expression Patterns of eNOS and iNOS in Endotoxemia

The extent of eNOS phosphorylation (Ser1177), as marker of active eNOS, in the jejunal tissue of the LPS-Ala and LPS-Arg treated groups was significantly decreased compared to the control group (both  $P < 0.05$ ). Interestingly, L-Citrulline supplementation to endotoxemic mice resulted in a higher jejunal degree of

phosphorylation of eNOS than in the LPS-Ala, LPS-Arg or control mice ( $n=6$  in all groups, all  $P<0.05$ ; **Figure 6A**). Moreover, a lower iNOS protein content was measured in the LPS-Cit group than in the LPS-Ala and LPS-Arg groups ( $n=6$ ) (**Figure 6B and 6C**:  $P<0.001$ ). As expected the LPS-Ala group showed significantly increased iNOS protein levels compared to controls ( $n=6$ ) (**Figure 6B**:  $P<0.05$ ).

## Discussion

Our study demonstrates beneficial effects of L-Citrulline supplementation in a mouse model of prolonged endotoxemia. We provide evidence for microcirculatory improvement with an increased number of perfused vessels in the microcirculation of the jejunal villi after L-Citrulline supplementation during endotoxemia, which was not observed following L-Arginine supplementation. These positive effects of citrulline appear to be mediated by increased plasma and tissue arginine availability, an enhanced presence of active phosphorylated eNOS and lower iNOS protein levels.

In this study we used a newly developed prolonged murine endotoxemia model (18 hours) to investigate the disturbances of the arginine-NO metabolism as reported in patients in whom prolonged exposure to endotoxin is expected. We, therefore, consider that this prolonged endotoxemia model mimics the human metabolic situation during endotoxemia-induced inflammatory conditions, in which we demonstrated a deficiency in arginine availability and associated decreased NO production during prolonged endotoxemia [44]. Thus far, disturbances in the arginine-NO metabolism were mainly studied in acute murine endotoxemia models [22,45–48]. In these models, arginine as substrate for NO was identified as key factor in development of the microcirculatory and perfusion disturbances related to endotoxemia. However, no deficit in the plasma arginine pool, comparable to the metabolic derangements reported in man, was found in these acute models [22,45–48]. It should however be mentioned that one experimental animal study reported significant changes in the arginine flux in the early stages of endotoxemia [48]. Our new model was based on a pilot observation in mice that plasma arginine concentrations decreased below baseline from 12 hours after the onset of the continuous endotoxin infusion, which is supported by the observations of Braulio et al [31]. This led us to use an 18 hours infusion period with endotoxin.

Arginine deficiency in inflammatory conditions has led to several experimental and human studies investigating modalities to restore the arginine-induced NO production [28–30,49]. However, a study in critically ill patients supplemented with L-Arginine did not result in increased whole-body NO production, as assessed with the conversion of labeled arginine into citrulline using stable isotopic infusion, despite increased arginine plasma concentrations (Luiking, Poeze, Deutz, unpublished data). In addition, also in a model of prolonged porcine endotoxemia, whole-body NO production was not increased during L-Arginine supplementation [34]. Here we show that L-Arginine supplementation increased tissue NO production as assessed with ESR spectroscopy combined with *in vivo* NO-trapping, while the jejunal microcirculation did not improve. We consider that a disbalance between iNOS and eNOS-mediated NO release could explain the lack of improvement in microcirculation. Under normal physiological conditions, eNOS activity is central to the microcirculatory homeostasis. However, during endotoxemia and inflammation, iNOS is upregulated whereas eNOS expression is downregulated [25] resulting in a disrupted microvascular perfusion, a redistribution of the microcirculatory flow, hypoxia,

and eventually organ failure [2,25]. In line, the present study demonstrated a disturbed microcirculation and low degree in tissue phosphorylation of eNOS-protein levels in the LPS-Ala group, which were both not restored by supplementation of L-Arginine. Moreover, L-Arginine supplementation did not affect iNOS protein levels compared to the LPS-Ala group. Interestingly, L-Citrulline supplementation resulted in a similar tissue NO increase, while both arginine and citrulline tissue levels were increased. We consider that the reduced iNOS protein levels combined with the enhanced levels of active eNOS and the enhanced arginine concentrations in tissue following L-Citrulline supplementation are responsible for the improved microcirculation. These data strongly suggest that the citrulline availability appears to be the key factor rather than arginine to enhance the eNOS-derived NO production, to reduce iNOS protein levels and thereby improve organ perfusion during endotoxemia. This is supported by an *in vitro* study by Goodwin et al indicating intracellular arginine regeneration from citrulline, via the Ass pathway, to be essential for eNOS-mediated NO production in endothelial cells [50]. In line with these data, Shen et al. [27] reported that citrulline is the major arginine pool for eNOS-mediated NO production, while extracellular arginine forms the only arginine pool for iNOS-induced NO production [27]. In line, an enhanced NO production was reported to require not only increased circulating arginine concentrations, but also enhanced citrulline availability during endotoxemia [15]. The effects of L-Citrulline supplementation: enhanced plasma arginine concentration and increased tissue arginine concentration may indicate that insufficient citrulline availability underlies the low arginine levels seen in endotoxemic mice [15,17,22]. Such a therapeutic role of L-Citrulline supplementation is also supported by very recent data of Elwafi et al [36], who showed that oral supplementation of L-Citrulline in rats resulted in higher plasma arginine concentrations compared to L-Arginine supplementation during acute endotoxemia [36]. In addition, the therapeutic role of L-Citrulline is not limited to endotoxemic conditions, as L-Citrulline supplementation has been demonstrated to be beneficial in several other pathological conditions associated with limited L-Arginine availability or enhanced arginine catabolism [51–54]. In these (patho)physiological conditions, such as sickle cell disease, heart failure, and pulmonary hypertension, L-Citrulline was shown to be more efficient than L-Arginine to enhance the plasma levels of arginine and the eNOS-derived NO production. [52–58]. Therefore, L-Citrulline is a promising tool in raising arginine plasma concentrations and associated endothelial NO-production in diseases with arginine deficiency and vascular dysfunction.

In conclusion, this study demonstrates that L-Citrulline and not L-Arginine supplementation during murine endotoxemia improves the microcirculation and results in increased plasma and tissue availability of citrulline, arginine and NO during endotoxemia. The positive effects of L-Citrulline supplementation are paralleled by increased functional eNOS protein levels and reduced iNOS protein levels during endotoxemia.

## Supporting Information

**Figure S1 Evaluation of the endotoxemia signs in the LPS treated groups compared to the control group.** The average clinical signs of endotoxemia were more pronounced in the LPS-Ala and LPS-Arg group compared to control and LPS-Cit treated animals. The characteristic clinical manifestations of endotoxemia (Lethargy, hypothermia, diarrhea, piloerection/erection of the fur, exudates around the eyes and nostrils and



diminished locomotor activity were scored by the animal care taker, blinded for treatment on a semi-quantitative 2 (absent/present) or 3-points (absent/moderate/severe) score. A 2-point score was used for lethargy, hypothermia and diarrhea and a 3-point score for piloerection, diminished locomotor activity and exudates around the eyes and nostrils. Data presented indicate median, interquartile, and 5%/95% range.  
(TIF)

**Figure S2 Circulation measurements with SDF imaging in the NaCl-Cit group compared to control.** (A) L-Citrulline supplementation during physiological conditions did not enhance the total number (mean  $\pm$  SEM) of measurable perfused vessels in the jejunal microcirculation, (B) or the vessels with a diameter  $\leq 10 \mu\text{m}$ , compared to control. (C) Also at the villus level, L-Citrulline supplementation did not enhance the total number of measurable perfused vessels. (D) A distribution of the number of perfused vessels per vessel diameter ( $\mu\text{m}$ ) shows a comparable number of vessels per group. (E) Also the vessels with a diameter  $\leq 10 \mu\text{m}$  per villus, did not differ between groups.  
(TIF)

**Figure S3 Plasma and jejunal tissue amino-acid concentrations under physiological conditions with or without L-Citrulline supplementation.** (A) Citrulline, arginine and ornithine plasma concentrations increased after L-Citrulline supplementation (NaCl-Cit) compared to control ( $P < 0.001$ ). (B) Tissue amino-acid concentrations of citrulline, arginine and ornithine were also significantly increased by L-Citrulline supplementation under physiological conditions.  
(TIF)

**Figure S4 Time-course of plasma arginine concentrations during prolonged LPS infusion.** Arginine plasma concentrations initially increased during the first hours of prolonged endotoxemia. However, arginine plasma concentrations decreased significantly below basal concentrations after 12 hours of continuous LPS infusion, which indicated an arginine deficient state in plasma. Each time point contains plasma concentrations of 6 mice. Data represented in mean  $\pm$  SEM.  
(TIF)

**Figure S5 Intracellular NO production in murine jejunal tissue under physiological conditions with or without L-Citrulline supplementation.** Citrulline supplementation (NaCl-Cit) did not result in enhanced NO production (measured as pmol mono-nitrosyl-iron complexes (MNIC)/mg wet tissue weight) compared to control in murine jejunal tissue.  
(TIF)

**Table S1 Summary of microcirculatory parameters in control groups and the LPS-treated groups with/without citrulline or arginine supplementation.** Total vessel density (TVD;  $\text{mm}/\text{mm}^2$ ) was calculated as the number of vessels crossing the arbitrary lines in Ava 3.0 divided by the total length of the lines. The perfused vessel density (PVD;  $\text{mm}/\text{mm}^2$ ) and proportion of perfused vessel (PPV; %) were calculated based on the TVD and perfusion of the total vessels. The microvascular flow index (MFI) is based on the determination of the predominant type of flow in the repeating microvascular structure (villi) in the four quadrants of the image (0 = absent, 1 = intermittent, with at least 50% of the time no flow, 2 = sludging, 3 = normal or 4 = hyperdynamic flow). The percentage of perfused villi was calculated as the number of perfused villi divided by the total number of villi present in the high power field. Superscript <sup>a</sup> P-value  $< 0.05$  comparing the LPS-Cit with the LPS-Ala group. Superscript <sup>b</sup> P-value  $< 0.01$  comparing LPS-Cit with the LPS-Arg group.

Superscript <sup>c</sup> P-value  $< 0.05$  comparing the control with the LPS-Arg group. Superscript <sup>d</sup> P-value  $< 0.01$  comparing the NaCl-Cit with the LPS-Arg group. Superscript <sup>e</sup> P-value  $< 0.0001$  comparing the control with the LPS-Ala group. Superscript <sup>f</sup> P-value  $< 0.01$  comparing the control with the LPS-Arg group. Superscript <sup>g</sup> P-value  $< 0.0001$  comparing the NaCl-Cit with the LPS-Ala group. Superscript <sup>h</sup> P-value  $< 0.01$  comparing the NaCl-Cit with the LPS-Ala group. Superscript <sup>i</sup> P-value  $< 0.05$  comparing LPS-Cit with the LPS-Arg group. Superscript <sup>j</sup> P-value  $< 0.01$  comparing control with the LPS-Ala group. Data are shown as mean  $\pm$  SEM. Statistical significance was determined with one-way ANOVA with post-hoc Bonferroni correction between groups.

(DOC)

**Methods S1** Detailed information of material and methods used in this study.

(DOC)

**Video S1 Live imaging with SDF imager of the jejunal microcirculation in the villi of control mouse.** In this video file the microcirculation is equally distributed in the villi, with a continuous and homogeneous distribution of the perfusion in the small and large vessels.

(AVI)

**Video S2 Live imaging with SDF imager of the jejunal microcirculation in the villi of LPS-Ala treated mouse.** The video shows a decreased perfusion of the microcirculation with flow mainly persisting in the largest vessels.

(AVI)

**Video S3 Live imaging with SDF imager of the jejunal microcirculation in the villi of LPS-Arg treated mouse.** The video shows a comparable decreased perfusion of the microcirculation as seen in the LPS-Ala treated mouse, with flow mainly persisting in the largest vessels.

(AVI)

**Video S4 Live imaging with SDF imager of the jejunal microcirculation in the villi of LPS-Cit treated mouse.** In this video file, the smallest microcirculatory vessels are also perfused. Furthermore, the perfusion is continuous and homogeneously distributed.

(AVI)

**Video S5 Live imaging with SDF imager of the jejunal microcirculation in the villi of NaCl-Cit treated mouse.** In this video the microcirculatory distribution is comparable to that in the control group with a continuous and homogeneously distributed perfusion.

(AVI)

## Acknowledgments

The authors wish to thank Mr. DM Meesters for the technical assistance during the experiments and analyses. The authors also wish to thank Mrs. B Bessens and Mr. HMH van Eijk, PhD, for HPLC measurements. We thank Professor L. Cynober and the company Citrage for providing the citrulline and Mr. M. Schreinemacher, MD for formatting the figures.

## Author Contributions

Conceived and designed the experiments: KAPW WHL WAB MP. Performed the experiments: KAPW. Analyzed the data: KAPW HV JJB EEF WHL WAB MP. Contributed reagents/materials/analysis tools: KAPW HV JJB EEF WHL WAB MP. Wrote the paper: KAPW WHL WAB MP.

## References

- Ince C (2002) The microcirculation unveiled. *Am J Respir Crit Care Med* 166: 1–2.
- Boerma EC, Mathura KR, van der Voort PH, Spronk PE, Ince C (2005) Quantifying bedside-derived imaging of microcirculatory abnormalities in septic patients: a prospective validation study. *Crit Care* 9: R601–606.
- Crouser ED, Julian MW, Dorinsky PM (1999) Ileal VO(2)-O(2) alterations induced by endotoxin correlate with severity of mitochondrial injury. *Am J Respir Crit Care Med* 160: 1347–1353.
- Kaul DK, Zhang X, Dasgupta T, Fabry ME (2008) Arginine therapy of transgenic-knockout sickle mice improves microvascular function by reducing non-nitric oxide vasodilators, hemolysis, and oxidative stress. *Am J Physiol Heart Circ Physiol* 295: H39–47.
- Krejci V, Hildebrand LB, Erni D, Sigurdsson GH (2003) Endothelin receptor antagonist bosentan improves microcirculatory blood flow in splanchnic organs in septic shock. *Crit Care Med* 31: 1369–1377.
- Ince C, Sinaasappel M (1999) Microcirculatory oxygenation and shunting in sepsis and shock. *Crit Care Med* 27: 1369–1377.
- Lehr HA, Bittinger F, Kirkpatrick CJ (2000) Microcirculatory dysfunction in sepsis: a pathogenetic basis for therapy? *J Pathol* 190: 373–386.
- McCuskey RS (1999) Hepatic and splanchnic microvascular responses to inflammation and shock. *Hepato-gastroenterology* 46 Suppl 2: 1464–1467.
- Stechmiller JK, Treloar D, Allen N (1997) Gut dysfunction in critically ill patients: a review of the literature. *Am J Crit Care* 6: 204–209.
- Bruins MJ, Luiking YC, Soeters PB, Akkermans LM, Deutz NE (2003) Effect of prolonged hyperdynamic endotoxemia on jejunal motility in fasted and enterally fed pigs. *Ann Surg* 237: 44–51.
- Schmidt H, Secchi A, Wellmann R, Bach A, Bohrer H, et al. (1996) Effect of endotoxemia on intestinal villus microcirculation in rats. *J Surg Res* 61: 521–526.
- Pittner A, Nalos M, Asfar P, Yang Y, Ince C, et al. (2003) Mechanisms of inducible nitric oxide synthase (iNOS) inhibition-related improvement of gut mucosal acidosis during hyperdynamic porcine endotoxemia. *Intensive Care Med* 29: 312–316.
- Derickx JP, Poeze M, van Bijnen AA, Buurman WA, Heineman E (2007) Evidence for intestinal and liver epithelial cell injury in the early phase of sepsis. *Shock* 28: 544–548.
- Matheson PJ, Wilson MA, Garrison RN (2000) Regulation of intestinal blood flow. *J Surg Res* 93: 182–196.
- Luiking YC, Engelen MP, Deutz NE (2010) Regulation of nitric oxide production in health and disease. *Curr Opin Clin Nutr Metab Care* 13: 97–104.
- Flam BR, Eichler DC, Solomonson LP (2007) Endothelial nitric oxide production is tightly coupled to the citrulline-NO cycle. *Nitric Oxide* 17: 115–121.
- Luiking YC, Poeze M, Ramsay G, Deutz NE (2009) Reduced citrulline production in sepsis is related to diminished de novo arginine and nitric oxide production. *Am J Clin Nutr* 89: 142–152.
- Kubes P, McCafferty DM (2000) Nitric oxide and intestinal inflammation. *Am J Med* 109: 150–158.
- Luiking YC, Poeze M, Dejong CH, Ramsay G, Deutz NE (2004) Sepsis: an arginine deficiency state? *Crit Care Med* 32: 2135–2145.
- Jeyabalan G, Klumpe JR, Nakao A, Martik N, Wu G, et al. (2008) Arginase blockade protects against hepatic damage in warm ischemia-reperfusion. *Nitric Oxide* 19: 29–35.
- Durante W, Johnson FK, Johnson RA (2007) Arginase: a critical regulator of nitric oxide synthesis and vascular function. *Clin Exp Pharmacol Physiol* 34: 906–911.
- Luiking YC, Hallemeesch MM, de Jonge WJ, Lamers WH, Deutz NE (2008) Reduced citrulline availability by OTC-deficiency in mice is related to reduced nitric oxide production. *Am J Physiol Endocrinol Metab* 295: E1315–E1322.
- Hollenberg SM, Broussard M, Osman J, Parrillo JE (2000) Increased microvascular reactivity and improved mortality in septic mice lacking inducible nitric oxide synthase. *Circ Res* 86: 774–778.
- Nathan C, Xie QW (1994) Nitric oxide synthases: roles, tolls, and controls. *Cell* 78: 915–918.
- Chen K, Inoue M, Wasa M, Fukuzawa M, Kamata S, et al. (1997) Expression of endothelial constitutive nitric oxide synthase mRNA in gastrointestinal mucosa and its downregulation by endotoxin. *Life Sci* 61: 1323–1329.
- Vissers YL, Debats IB, Luiking YC, Jalar N, van der Hulst RR, et al. (2004) Pro and cons of L-arginine supplementation in disease. *Nutr Res Rev* 17: 193–210.
- Shen LJ, Beloussow K, Shen WC (2005) Accessibility of endothelial and inducible nitric oxide synthase to the intracellular citrulline-arginine regeneration pathway. *Biochem Pharmacol* 69: 97–104.
- Bode-Boger SM, Boger RH, Galland A, Tsikas D, Frolich JC (1998) L-arginine-induced vasodilation in healthy humans: pharmacokinetic-pharmacodynamic relationship. *Br J Clin Pharmacol* 46: 489–497.
- Boger RH, Bode-Boger SM (2001) The clinical pharmacology of L-arginine. *Annu Rev Pharmacol Toxicol* 41: 79–99.
- Fukatsu K, Ueno C, Maeshima Y, Hara E, Nagayoshi H, et al. (2004) Effects of L-arginine infusion during ischemia on gut blood perfusion, oxygen tension, and circulating myeloid cell activation in a murine gut ischemia/reperfusion model. *JPEN J Parenter Enteral Nutr* 28: 224–230; discussion 230–221.
- Braulio VB, Ten Have GA, Vissers YL, Deutz NE (2004) Time course of nitric oxide production after endotoxin challenge in mice. *Am J Physiol Endocrinol Metab* 287: E912–918.
- Hallemeesch MM, Cobben DC, Dejong CH, Soeters PB, Deutz NE (2000) Renal amino acid metabolism during endotoxemia in the rat. *J Surg Res* 92: 193–200.
- Olfert ED, Godson DL (2000) Humane endpoints for infectious disease animal models. *Ilar J* 41: 99–104.
- Poeze M, Bruins MJ, Kessels F, Luiking YC, Lamers WH, et al. (2011) Effects of L-arginine pretreatment on nitric oxide metabolism and hepatosplanchnic perfusion during porcine endotoxemia. *Am J Clin Nutr* 93: 1237–1247.
- Osowska S, Duchemann T, Walrand S, Paillard A, Boirie Y, et al. (2006) Citrulline modulates muscle protein metabolism in old malnourished rats. *Am J Physiol Endocrinol Metab* 291: E582–586.
- Elwafi F, Curis E, Zerrouk N, Neveux N, Chaumeil JC, et al. (2011) Endotoxemia affects citrulline, arginine and glutamine bioavailability. *Eur J Clin Invest* 42: 282–289.
- Groner W, Winkelman JW, Harris AG, Ince C, Bouma GJ, et al. (1999) Orthogonal polarization spectral imaging: a new method for study of the microcirculation. *Nat Med* 5: 1209–1212.
- Spronk PE, Ince C, Gardien MJ, Mathura KR, Oudemans-van Straaten HM, et al. (2002) Nitroglycerin in septic shock after intravascular volume resuscitation. *Lancet* 360: 1395–1396.
- Massberg S, Eisenmenger S, Enders G, Krombach F, Messmer K (1998) Quantitative analysis of small intestinal microcirculation in the mouse. *Res Exp Med* 198: 23–35.
- De Backer D, Hollenberg S, Boerma C, Goedhart P, Buchele G, et al. (2007) How to evaluate the microcirculation: report of a round table conference. *Crit Care* 11: R101.
- Verdant CL, De Backer D, Bruhn A, Clausi CM, Su F, et al. (2009) Evaluation of sublingual and gut mucosal microcirculation in sepsis: a quantitative analysis. *Crit Care Med* 37: 2875–2881.
- van Eijk HM, Rooyackers DR, Deutz NE (1993) Rapid routine determination of amino acids in plasma by high-performance liquid chromatography with a 2–3 microns Spherisorb ODS II column. *J Chromatogr* 620: 143–148.
- van Faassen EE, Koeners MP, Joles JA, Vanin AF (2008) Detection of basal NO production in rat tissues using iron-dithiocarbamate complexes. *Nitric Oxide* 18: 279–286.
- Poeze M, Bruins MJ, Luiking YC, Deutz NE (2010) Reduced caloric intake during endotoxemia reduces arginine availability and metabolism. *Am J Clin Nutr* 91: 992–1001.
- Luiking YC, Hallemeesch MM, Vissers YL, Lamers WH, Deutz NE (2004) In vivo whole body and organ arginine metabolism during endotoxemia (sepsis) is dependent on mouse strain and gender. *J Nutr* 134: 2768S–2774S; discussion 2796S–2797S.
- Luiking YC, Hallemeesch MM, Lamers WH, Deutz NE (2005) The role of NOS2 and NOS3 in renal protein and arginine metabolism during early endotoxemia in mice. *Am J Physiol Renal Physiol* 288: F816–822.
- Hallemeesch MM, Lamers WH, Deutz NE (2002) Reduced arginine availability and nitric oxide production. *Clin Nutr* 21: 273–279.
- Ventura G, Moineau C, Segaud F, Le Plénier S, Cynober L, et al. (2010) Adaptive response of nitrogen metabolism in early endotoxemia: role of ornithine aminotransferase. *Amino Acids* 39: 1417–1426.
- Bruins MJ, Soeters PB, Lamers WH, Meijer AJ, Deutz NE (2002) L-arginine supplementation in hyperdynamic endotoxemic pigs: effect on nitric oxide synthesis by the different organs. *Crit Care Med* 30: 508–517.
- Goodwin BL, Solomonson LP, Eichler DC (2004) Argininosuccinate synthase expression is required to maintain nitric oxide production and cell viability in aortic endothelial cells. *J Biol Chem* 279: 18353–18360.
- Hartman WJ, Torre PM, Prior RL (1994) Dietary citrulline but not ornithine counteracts dietary arginine deficiency in rats by increasing splanchnic release of citrulline. *J Nutr* 124: 1950–1960.
- Waugh WH, Daeschner CW, 3rd, Files BA, McConnell ME, Strandjord SE (2001) Oral citrulline as arginine precursor may be beneficial in sickle cell disease: early phase two results. *J Natl Med Assoc* 93: 363–371.
- Barr FE, Tirona RG, Taylor MB, Rice G, Arnold J, et al. (2007) Pharmacokinetics and safety of intravenously administered citrulline in children undergoing congenital heart surgery: potential therapy for postoperative pulmonary hypertension. *J Thorac Cardiovasc Surg* 134: 319–326.
- Smith HA, Canter JA, Christian KG, Drinkwater DC, Scholl FG, et al. (2006) Nitric oxide precursors and congenital heart surgery: a randomized controlled trial of oral citrulline. *J Thorac Cardiovasc Surg* 132: 58–65.
- Orea-Tejeda A, Orozco-Gutierrez JJ, Castillo-Martinez L, Keirns-Davies C, Montano-Hernandez P, et al. (2010) The effect of L-arginine and citrulline on endothelial function in patients in heart failure with preserved ejection fraction. *Cardiol J* 17: 464–470.
- Orozco-Gutierrez JJ, Castillo-Martinez L, Orea-Tejeda A, Vazquez-Diaz O, Valdespino-Trejo A, et al. (2010) Effect of L-arginine or L-citrulline oral supplementation on blood pressure and right ventricular function in heart failure patients with preserved ejection fraction. *Cardiol J* 17: 612–618.

57. Tain YL, Hsieh CS, Lin IC, Chen CC, Sheen JM, et al. (2010) Effects of maternal L-citrulline supplementation on renal function and blood pressure in offspring exposed to maternal caloric restriction: the impact of nitric oxide pathway. *Nitric Oxide* 23: 34–41.
58. Koeners MP, van Faassen EE, Wesseling S, de Sain-van der Velden M, Koomans HA, et al. (2007) Maternal supplementation with citrulline increases renal nitric oxide in young spontaneously hypertensive rats and has long-term antihypertensive effects. *Hypertension* 50: 1077–1084.
